# Supplementary figures and images for: Temperature-dependent resistive switching statistics and mechanisms in nanoscale graphene–SiO2–graphene memristors
Source: Royal Society of Chemistry journal article supplement (doi:10.1039/d5nr01019e), 2025-01-01

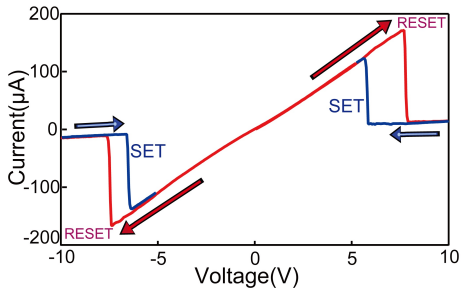

Supplement: d5nr01019e5.pdf [file d5nr01019e5.pdf]

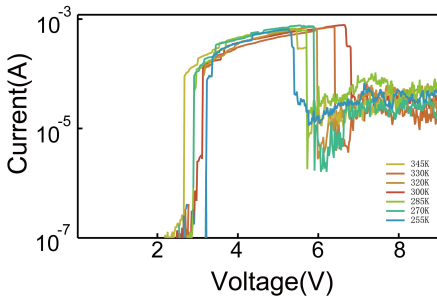

Supplement: d5nr01019e6.pdf [file d5nr01019e6.pdf]
